# Supplementary material
Source: PubMed Central journal article supplement (PMC3232113)
Supplement: supp_0022034511407338_DS_10.1177_0022034511407338.pdf [file supp_0022034511407338_DS_10.1177_0022034511407338.pdf]

J.G. Tew<sup>1\*</sup>, M.E. El Shikh<sup>2</sup>, R.M. El Sayed<sup>2</sup>,  
and H.A. Schenkein<sup>1</sup>

<sup>1</sup>Clinical Research Center for Periodontal Diseases, School of Dentistry, VCU, PO Box 980556, Richmond, VA 23298-0556, USA; and <sup>2</sup>present address, William Harvey Research Institute, Barts and the London School of Medicine and Dentistry, Queen Mary University of London, Charterhouse Square, London EC1M 6BQ, UK; \*corresponding author, tew@vcu.edu

# Dendritic Cells, Antibodies Reactive with oxLDL, and Inflammation

*J Dent Res* DOI: 10.1177/0022034511407338

## APPENDIX

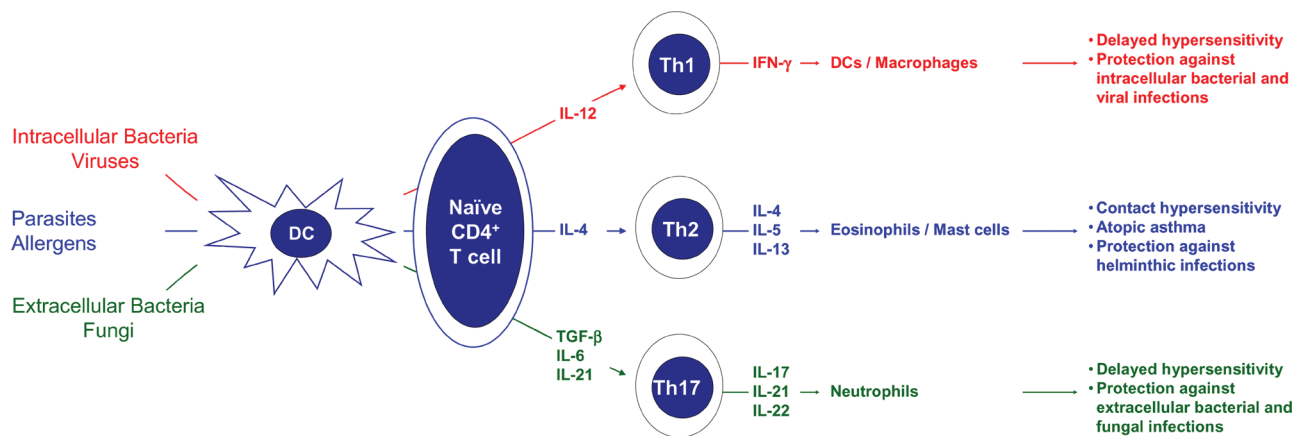

**Appendix Figure.** Influence of dendritic cell cytokines on T-helper cell activation and differentiation. These cytokines are secreted during Ag processing and presentation to T-cells. In turn, different T-helper cell subsets secrete different cytokines that help regulate their effector functions. Further background information on DC heterogeneity, activation, maturation, antigen presentation, and T-helper cell diversification, as well as immune regulation via activating Fc receptors and their signal transduction pathways, can be found in the following reviews, which include elegant illustrations:

Banchereau J, Steinman RM (1998). Dendritic cells and the control of immunity. *Nature* 392:245-252. <http://www.nature.com/nature/journal/v392/n6673/pdf/392245a0.pdf>

Liu K, Nussenzweig MC (2010). Origin and development of dendritic cells. *Immunol Rev* 234:45-54. <http://onlinelibrary.wiley.com/doi/10.1111/j.0105-2896.2009.00879.x/pdf>

Nimmerjahn F, Ravetch JV (2007). Fc-receptors as regulators of immunity. *Adv Immunol* 96:179-204. [http://www.sciencedirect.com/science?\\_ob=MImg&\\_imagekey=B7CT8-4R295JF-5-7&\\_cdi=18044&\\_user=125872&\\_pii=S0065277607960058&\\_origin=search&\\_coverDate=12%2F31%2F2007&\\_sk=999039999&view=c&wchp=dGLz-Vlb-zSkWb&md5=fba4a84453e746a56f5b5e82885ae217&ie=/sdarticle.pdf](http://www.sciencedirect.com/science?_ob=MImg&_imagekey=B7CT8-4R295JF-5-7&_cdi=18044&_user=125872&_pii=S0065277607960058&_origin=search&_coverDate=12%2F31%2F2007&_sk=999039999&view=c&wchp=dGLz-Vlb-zSkWb&md5=fba4a84453e746a56f5b5e82885ae217&ie=/sdarticle.pdf)

Nimmerjahn F, Ravetch JV (2008). Fcγ receptors as regulators of immune responses. *Nat Rev Immunol* 8:34-47. <http://www.nature.com/nri/journal/v8/n1/pdf/nri2206.pdf>

Nimmerjahn F, Ravetch JV (2010). Antibody-mediated modulation of immune responses. *Immunol Rev* 236:265-275. <http://onlinelibrary.wiley.com/doi/10.1111/j.1600-065X.2010.00910.x/pdf>

Ueno H, Klechevsky E, Morita R, Asford C, Cao T, Matsui T, *et al.* (2007). Dendritic cell subsets in health and disease. *Immunol Rev* 219:118-142. <http://onlinelibrary.wiley.com/doi/10.1111/j.1600-065X.2007.00551.x/pdf>

Ueno H, Schmitt N, Palucka AK, Banchereau J (2010). Dendritic cells and humoral immunity in humans. *Immunol Cell Biol* 88:376-380. <http://www.nature.com/icb/journal/v88/n4/pdf/icb201028a.pdf>

Wilson CB, Rowell E, Sekimata M (2009). Epigenetic control of T-helper-cell differentiation. *Nat Rev Immunol* 9(2):91-105. <http://www.nature.com/nri/journal/v9/n2/pdf/nri2487.pdf>
